# Supplementary material for: Effects of a water extract of Lepidium meyenii root in different models of persistent pain in rats
Source: publisher site journal article supplement (doi:10.1515/znc-2016-0251), 2017-08-20
Supplement: Supplementary file 1 [file Supplementary_information.docx]

**Table 1.** Elution programs applied for the HPLC analyses with the two columns: the *Lepidium meyenii* water extract (W) was onKinetex HILIC and the acetonitrile/methanol (AM) extract was on Gemini C18

| **Gemini C18**  (Flow rate 300 µL min-1) | | **Kinetex HILIC**  (Flow rate 250 µL min-1) | |
| --- | --- | --- | --- |
| Time (min) | % B | Time (min) | % B |
| 0 | 5 | 0 | 100 |
| 25 | 35 | 5 | 100 |
| 35 | 50 | 10 | 50 |
| 40 | 100 | 14 | 60 |
| 50 | 100 | 17 | 60 |

**Supplementary Figure legends**

**Supplementary Figure S1.** Chromatography. a) base peak chromatogram (m z-1 300-450) of the AM extract in positive ion mode. b) extracted ion profiles for some of macamides detected in the AM extract in positive ion mode. All the profiles are the sum of [M+H]+ and [M+Na]+ ion intensities, with the exception of the species at 370 m z-1 and 374 m z-1 for which the [M+Na]+ intensity was negligible.

**Supplementary Figure S2.** AM extract: a) profile at 330 nm and UV-Vis spectra of the **1-4** unknown compounds; b) base peak chromatogram in positive ion mode and the extract ion profiles of the **3** and **4** unknown analytes reported as sum of [M+H]+ and [M+Na]+ species.
